# Supplementary material for: Economic evaluations performed alongside randomized implementation trials in clinical settings: a systematic review
Source: PubMed Central journal article supplement (PMC10943844; doi:10.1186/s43058-024-00562-3), 2024-03-15
Supplement: 43058_2024_562_MOESM2_ESM.pdf [file 43058_2024_562_MOESM2_ESM.pdf]

**Additional file 2:** Complete search strategy for economic evaluations embedded in implementation trials

Name of the database platform: Ovid

Title of the database searched: Medline ® and E-pub Ahead of Print, In-Process, In-Data Review & Other non-indexed citations, daily and versions

Database date range: 1946 to present

Date database last searched: 23 March 2023

Date limits: None

Complete search strategy:

- 1 cost-benefit analysis/ or cost-effectiveness analysis/ or Economics, Pharmaceutical/
- 2 ((economic adj2 (evaluation or analys\$ or cost\$)) or (cost adj2 (effectiv\$ or utilit\$ or benefi\$ or minim\$ or efficienc\$ or consequenc\$)) or pharmacoeconomic\$ or (willingness adj2 pay) or (value adj2 money)).ti,ab.
- 3 1 or 2
- 4 ((energy or oxygen) adj2 cost).ti,ab.
- 5 (metabolic adj2 cost).ti,ab.
- 6 ((energy or oxygen) adj2 expenditure).ti,ab.
- 7 or/4-6
- 8 3 not 7
- 9 (randomized controlled trial or controlled clinical trial).pt.
- 10 (randomized or randomised or placebo or randomly or "implementation trial" or "effectiveness-implementation trial" or (hybrid adj3 trial)).ab.
- 11 9 or 10
- 12 Evidence-based Practice/ or Evidence-Based Medicine/ or Implementation Science/ or Program Evaluation/
- 13 (acceptability or adoption or appropriateness or feasibility or sustainability or fidelity or penetration or (quality adj2 improvement) or (implementation adj3 cost\$)).ti,ab.
- 14 or/12-13
- 15 8 and 11 and 14
- 16 ("community-based" or "community based" or "school-based").ti,ab.
- 17 15 not 16
- 18 exp animals/ not humans/
- 19 exp agriculture/
- 20 18 or 19
- 21 17 not 20
- 22 (letter or editorial or historical article or meta analysis or "review" or "systematic review").pt.
- 23 21 not 22

Returns: 3722

Name of the database platform: Ovid

Title of the database searched: EBM Reviews – Health Technology Assessment

Database date range: 4<sup>th</sup> quarter 2016 to present

Date database last searched: 23 March 2023

Date limits: None

Complete search strategy:

1 exp "costs and cost analysis"/ or economics, dental/ or economics, hospital/ or economics, medical/ or economics, nursing/ or economics, pharmaceutical/ or technology assessment, biomedical/ or "health care quality, access, and evaluation"/

2 ((economic\$ adj2 evaluation) or (economic\$ adj2 cost\$) or (economic\$ adj2 analys\$) or (cost adj2 (effectiv\$ or utilit\$ or benefi\$ or minim\$ or efficienc\$ or consequenc\$)) or pharmacoeconomic\$ or (willingness adj2 pay) or (value adj2 money)).ti.

3 1 or 2

4 Evidence-Based Medicine/ or "Diffusion of Innovation"/ or Program Evaluation/

5 (acceptability or adoption or appropriateness or feasibility or sustainability or fidelity or penetration or (quality adj2 improvement) or (implementation adj3 cost\$)).ti.

6 4 or 5

7 3 and 6

Returns: 75

Name of the database platform: Ovid

Title of the database searched: EBM Reviews – NHS Economic Evaluation Database

Database date range: 1<sup>st</sup> quarter 2016 to present

Date database last searched:

Date limits: None

Complete search strategy:

1 (randomized or randomised or placebo or randomly or "implementation trial" or "effectiveness-implementation trial" or (hybrid adj3 trial)).ti.

2 drug therapy.fs.

3 1 or 2

4 Evidence-Based Medicine/ or "Diffusion of Innovation"/ or Program Evaluation/

5 (acceptability or adoption or appropriateness or feasibility or sustainability or fidelity or penetration or (quality adj2 improvement) or (implementation adj3 cost\$)).ti.

6 or/4-5

7 3 and 6

Returns: 101

Name of the database platform: Ovid

Title of the database searched: Embase Classic + Embase

Database date range: 1947 to present

Date database last searched: 23 March 2023

Date limits: None

Complete search strategy:

- 1 exp economic evaluation/ or pharmacoeconomics/
- 2 ((economic\$ adj2 (evaluation or analys\$ or cost\$)) or (cost adj2 (effectiv\$ or utilit\$ or benefi\$ or minim\$ or efficienc\$ or consequenc\$)) or pharmacoeconomic\$ or (willingness adj2 pay) or (value adj2 money)).ti,ab.
- 3 1 or 2
- 4 ((energy or oxygen or metabolic) adj2 cost).ti,ab.
- 5 ((energy or oxygen) adj2 expenditure).ti,ab.
- 6 4 or 5
- 7 3 not 6
- 8 randomized controlled trial/
- 9 (randomized or randomised or placebo or randomly or "implementation trial" or "effectiveness-implementation trial" or (hybrid adj3 trial)).ab.
- 10 8 or 9
- 11 Evidence-based Practice/ or Evidence-Based Medicine/ or Implementation Science/ or Program Evaluation/
- 12 (acceptability or adoption or appropriateness or feasibility or sustainability or fidelity or penetration or (quality adj2 improvement) or (implementation adj3 cost\$)).ti,ab.
- 13 11 or 12
- 14 7 and 10 and 13
- 15 ("community-based" or "community based" or "school-based").ti,ab.
- 16 14 not 15
- 17 exp animals/ not humans/
- 18 exp agriculture/
- 19 17 or 18
- 20 16 not 19
- 21 (letter or editorial or historical article or meta analysis or "review" or "systematic review").pt.
- 22 20 not 21

Returns: 3906

Name of the database platform: EBSCO

Title of the database searched: CINAHL Plus and Econlit

Database date range: CINAHL Plus (1937 to present); Econlit (1886 to present)

Date database last searched: 23 March 2023

Date limits: None

Complete search strategy:

S1 (MH "Cost Benefit Analysis")

S2 TI ( (economic N2 evaluation) or (economic N2 analys##) or (cost N2 (effectiv##### or utilit### or benefi##### or minimi#ation or efficienc### or consequenc#)) or pharmacoeconomic# or (willingness N2 pay) or (value N2 money) ) OR AB ( (economic N2 evaluation) or (economic N2 analys##) or (cost N2 (effectiv##### or utilit### or benefi##### or minimi#ation or efficienc### or consequenc#)) or pharmacoeconomic# or (willingness N2 pay) or (value N2 money) )

S3 (S1 OR S2)

S4 TI ( (energy or oxygen or metabolic) N2 cost ) OR AB ( (energy or oxygen or metabolic) N2 cost ) OR TI ( (energy or oxygen) N2 expenditure ) OR AB ( (energy or oxygen) N2 expenditure )

S5 S3 NOT S4

S6 (MH "Randomized Controlled Trials")

S7 AB randomized or randomised or placebo or randomly or "implementation trial" or "effectiveness-implementation trial" or (hybrid N3 trial)

S8 S6 OR S7

S9 (MH "Medical Practice, Evidence-Based") OR (MH "Nursing Practice, Evidence-Based") OR (MH "Professional Practice, Research-Based")

S10 (MH "Implementation Science")

S11 (MH "Program Evaluation")

S12 TI ( acceptability or adoption or appropriateness or feasibility or sustainability or fidelity or penetration or (quality N2 improvement) or (implementation N3 cost#) ) OR AB ( acceptability or adoption or appropriateness or feasibility or sustainability or fidelity or penetration or (quality N2 improvement) or (implementation N3 cost#) )

S13 S9 OR S10 OR S11 OR S12

S14 S5 AND S8 AND S13

S15 TI ( "community-based" or "community based" or "school-based" ) AND AB ( "community-based" or "community based" or "school-based" )

S16 (MH "Animals+")

S17 (MH "Agriculture+")

S18 S16 OR S17

S19 S14 NOT S15

S20 S19 NOT S18

S21 S20 NOT (MH "Literature Review+")

Returns: 1456

Name of the database platform: Web of Science

Title of the database searched: Science Citation Index Expanded

Database date range: 1900 to present

Date database last searched: 23 March 2023

Date limits: None

Complete search strategy:

- 1 TI=((economic NEAR/2 evaluation) or (economic NEAR/2 analys\*) or (cost NEAR/2 (effectiv\* or utilit\* or benefi\* or minimi\*ation or efficienc\* or consequence\*)) or pharmacoeconomic\* or (willingness NEAR/2 pay) or (value NEAR/2 money) ) OR AB=((economic NEAR/2 evaluation) or (economic NEAR/2 analys\*) or (cost NEAR/2 (effectiv\* or utilit\* or benefi\* or minimi\*ation or efficienc\* or consequence\*)) or pharmacoeconomic\* or (willingness NEAR/2 pay) or (value NEAR/2 money) )
- 2 TI=(((energy or oxygen or metabolic) NEAR/2 cost ) OR ((energy or oxygen) NEAR/2 expenditure )) OR AB=(((energy or oxygen or metabolic) NEAR/2 cost ) OR ((energy or oxygen) NEAR/2 expenditure ))
- 3 #1 NOT #2
- 4 AB=(randomized or randomised or placebo or randomly or "implementation trial" or "effectiveness-implementation trial" or (hybrid NEAR/2 trial))
- 5 TI=( acceptability or adoption or appropriateness or feasibility or sustainability or fidelity or penetration or (quality NEAR/2 improvement) or (implementation NEAR/2 cost\*)) OR AB=( acceptability or adoption or appropriateness or feasibility or sustainability or fidelity or penetration or (quality NEAR/2 improvement) or (implementation NEAR/2 cost\*))
- 6 #5 AND #4 AND #3
- 7 TI=("community-based" or "community based" or "school-based" ) OR AB=("community-based" or "community based" or "school-based" )
- 8 #6 NOT #7
- 9 DT=(Editorial Material OR Letter OR Review)
- 10 #8 NOT #9

Returns: 2605
