# Supplementary material for: Economic evaluations performed alongside randomized implementation trials in clinical settings: a systematic review
Source: PubMed Central journal article supplement (PMC10943844; doi:10.1186/s43058-024-00562-3), 2024-03-15
Supplement: 43058_2024_562_MOESM3_ESM.pdf [file 43058_2024_562_MOESM3_ESM.pdf]

|                                                                                          |     |     |     |     |     |     |     |     |     |     |
|------------------------------------------------------------------------------------------|-----|-----|-----|-----|-----|-----|-----|-----|-----|-----|
| number of effectiveness studies).                                                        |     |     |     |     |     |     |     |     |     |     |
| The primary outcome measure(s) for the economic evaluation are clearly stated.           | Yes | Yes | Yes | Yes | Yes | Yes | Yes | Yes | Yes | Yes |
| Methods to value benefits are stated.                                                    | Yes | Yes | Yes | Yes | Yes | Yes | Yes | Yes | Yes | Yes |
| Details of the subjects from whom valuations were obtained were given.                   | Yes | Yes | Yes | Yes | Yes | Yes | Yes | Yes | Yes | Yes |
| Productivity changes (if included) are reported separately.                              | -   | -   | -   | -   | -   | -   | -   | -   | -   | -   |
| The relevance of productivity changes to the study question is discussed.                | -   | -   | -   | -   | -   | -   | -   | -   | -   | -   |
| Quantities of resource use are reported separately from their unit costs.                | Yes | Yes | Yes | Yes | Yes | Yes | Yes | Yes | Yes | Yes |
| Methods for the estimation of quantities and unit costs are described.                   | Yes | Yes | Yes | Yes | Yes | Yes | Yes | Yes | Yes | Yes |
| Currency and price data are recorded.                                                    | No  | No  | Yes | No  | No  | Yes | No  | Yes | Yes | Yes |
| Details of currency of price adjustments for inflation or currency conversion are given. | No  | No  | Yes | No  | No  | No  | No  | Yes | Yes | No  |
| Details of any model used are given.                                                     | -   | -   | Yes | Yes | -   | -   | -   | Yes | Yes | -   |
| The choice of model used and the key parameters on which it is based are justified.      | -   | -   | Yes | Yes | -   | -   | -   | Yes | -   | -   |
| Time horizon of costs and benefits is stated.                                            | No  | Yes | Yes | Yes | No  | No  | No  | Yes | No  | Yes |

|                                                                                      |           |           |           |           |           |           |           |           |           |           |
|--------------------------------------------------------------------------------------|-----------|-----------|-----------|-----------|-----------|-----------|-----------|-----------|-----------|-----------|
| The discount rate(s) is stated.                                                      | No        | -         | Yes       | No        | -         | No        | No        | -         | -         | -         |
| The choice of discount rate(s) is justified.                                         | -         | -         | Yes       | No        | -         | -         | -         | -         | -         | -         |
| An explanation is given if costs and benefits are not discounted.                    | No        | No        | -         | No        | -         | No        | No        | No        | -         | -         |
| Details of statistical tests and confidence intervals are given for stochastic data. | Yes       | Yes       | Yes       | Yes       | Yes       | Yes       | Yes       | Yes       | Yes       | Yes       |
| The approach to sensitivity analysis is given.                                       | -         | Yes       | Yes       | Yes       | Yes       | Yes       | Yes       | Yes       | -         | Yes       |
| The choice of variables for sensitivity analysis is justified.                       | -         | Yes       | Yes       | Yes       | Yes       | Yes       | Yes       | Yes       | -         | Yes       |
| The ranges over which the variables are varied are justified.                        | Yes       | Yes       | Yes       | Yes       | Yes       | Yes       | Yes       | Yes       | Yes       | Yes       |
| Relevant alternatives are compared.                                                  | Yes       | Yes       | Yes       | Yes       | Yes       | Yes       | Yes       | Yes       | Yes       | Yes       |
| Incremental analysis is reported.                                                    | Yes       | Yes       | Yes       | Yes       | Yes       | Yes       | Yes       | Yes       | Yes       | Yes       |
| Major outcomes are presented in a disaggregated as well as aggregated form.          | Yes       | Yes       | Yes       | Yes       | Yes       | Yes       | Yes       | Yes       | Yes       | Yes       |
| The answer to the study question is given.                                           | Yes       | Yes       | Yes       | Yes       | Yes       | Yes       | Yes       | Yes       | Yes       | Yes       |
| Conclusions follow from the data reported.                                           | Yes       | Yes       | Yes       | Yes       | Yes       | Yes       | Yes       | Yes       | Yes       | Yes       |
| Conclusions are accompanied by the appropriate caveats.                              | Yes       | Yes       | Yes       | Yes       | Yes       | Yes       | Yes       | Yes       | Yes       | Yes       |
| <b>Total score</b>                                                                   | <b>22</b> | <b>25</b> | <b>31</b> | <b>27</b> | <b>23</b> | <b>24</b> | <b>24</b> | <b>28</b> | <b>24</b> | <b>26</b> |
